# Supplementary material
Source: PubMed Central journal article supplement (PMC3249067)
Supplement: supp_M111.308296_jbc.M111.308296-1.pdf [file supp_M111.308296_jbc.M111.308296-1.pdf]

**A****Mouse kidney**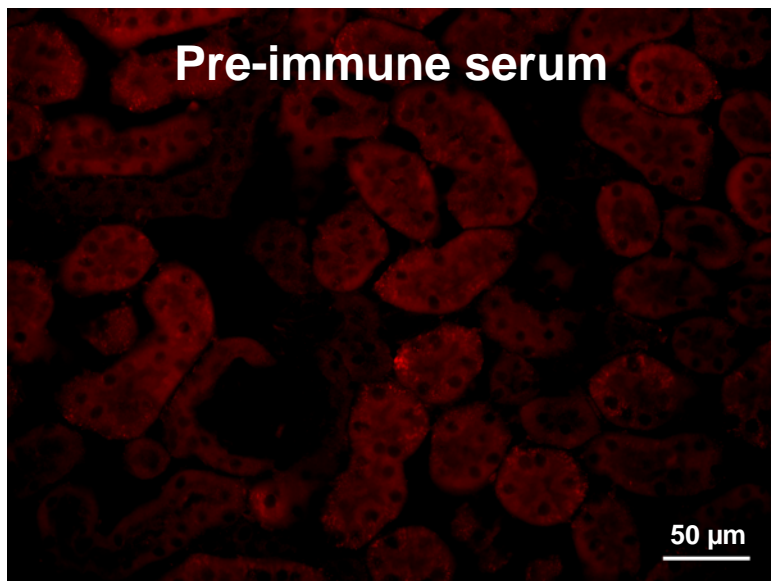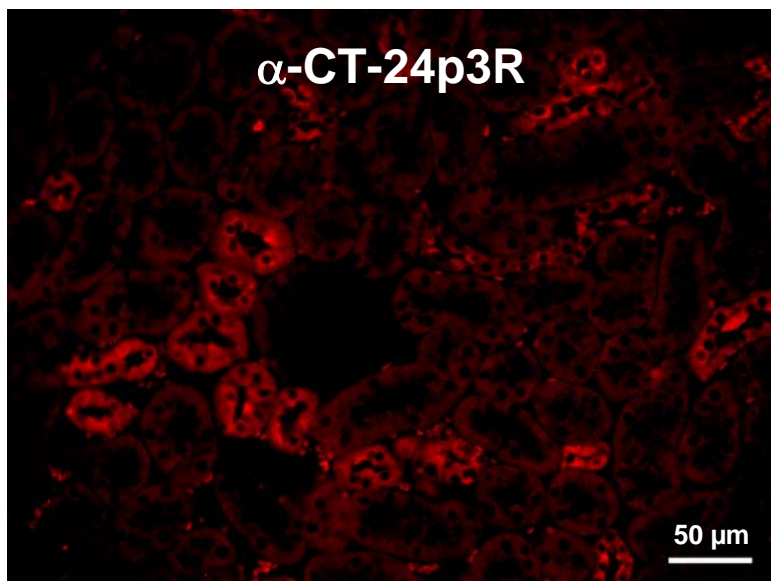**B****HEK293 cells**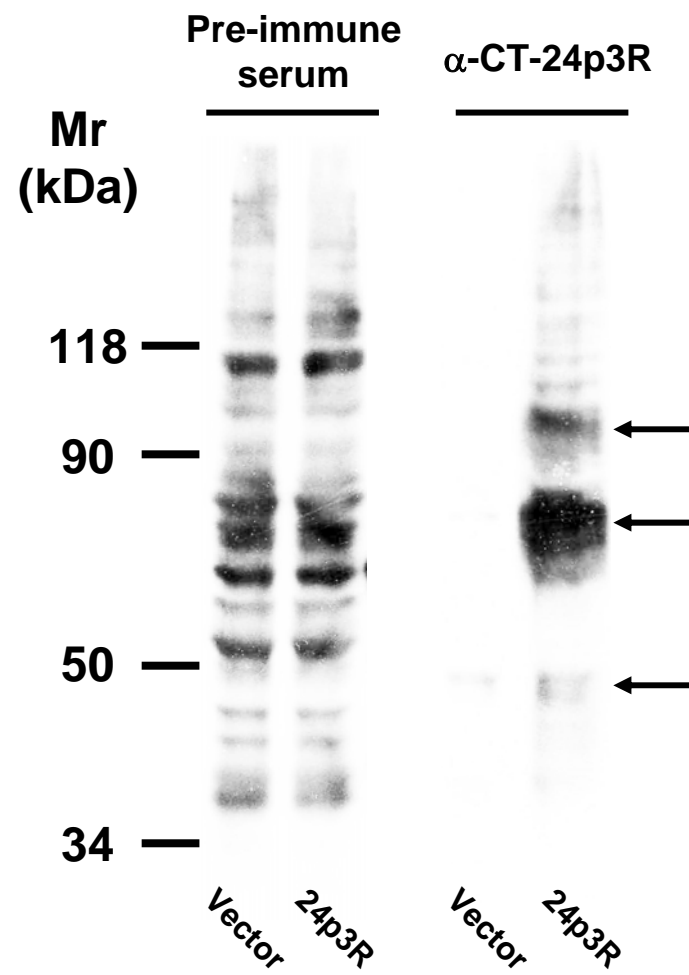

**C****24p3R-CHO**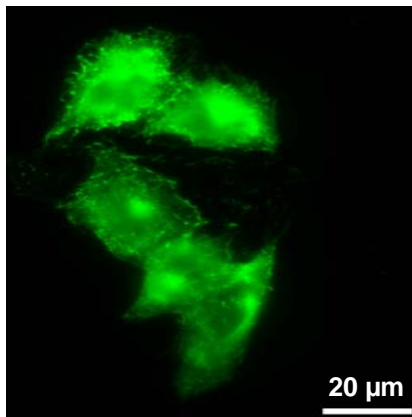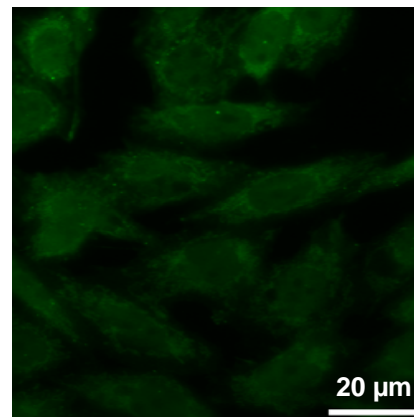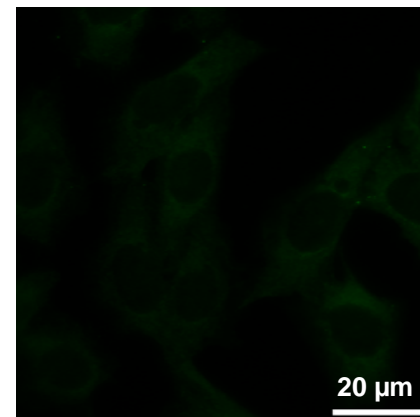**vector-CHO**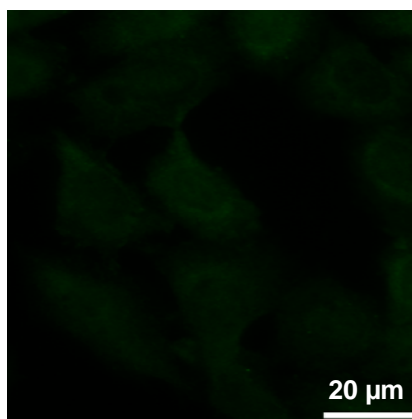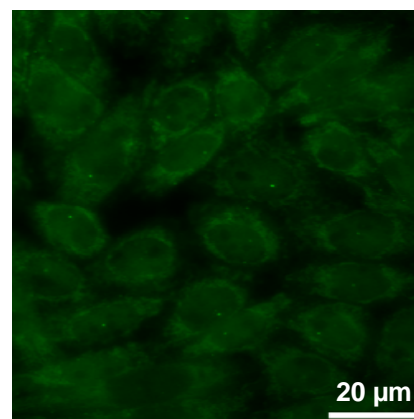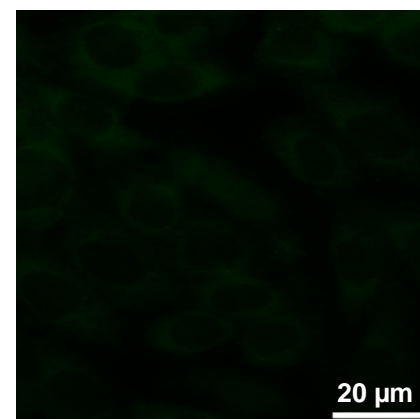**mDCT209**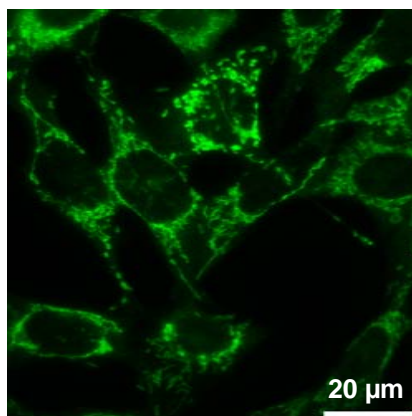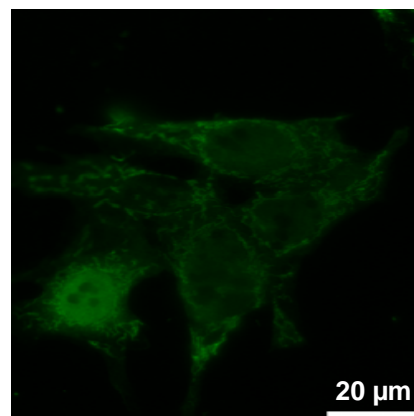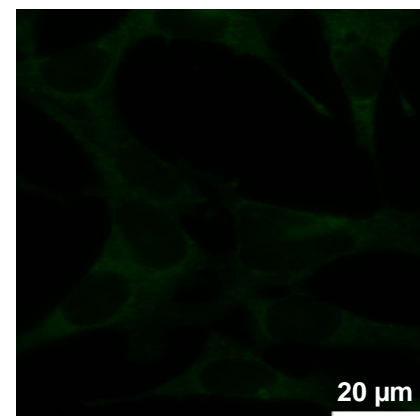 **$\alpha$ -NT-24p3R****Pre-immune serum****Pre-absorption**

**D**

**CHO cells**

**$\alpha$ -CT-24p3R**

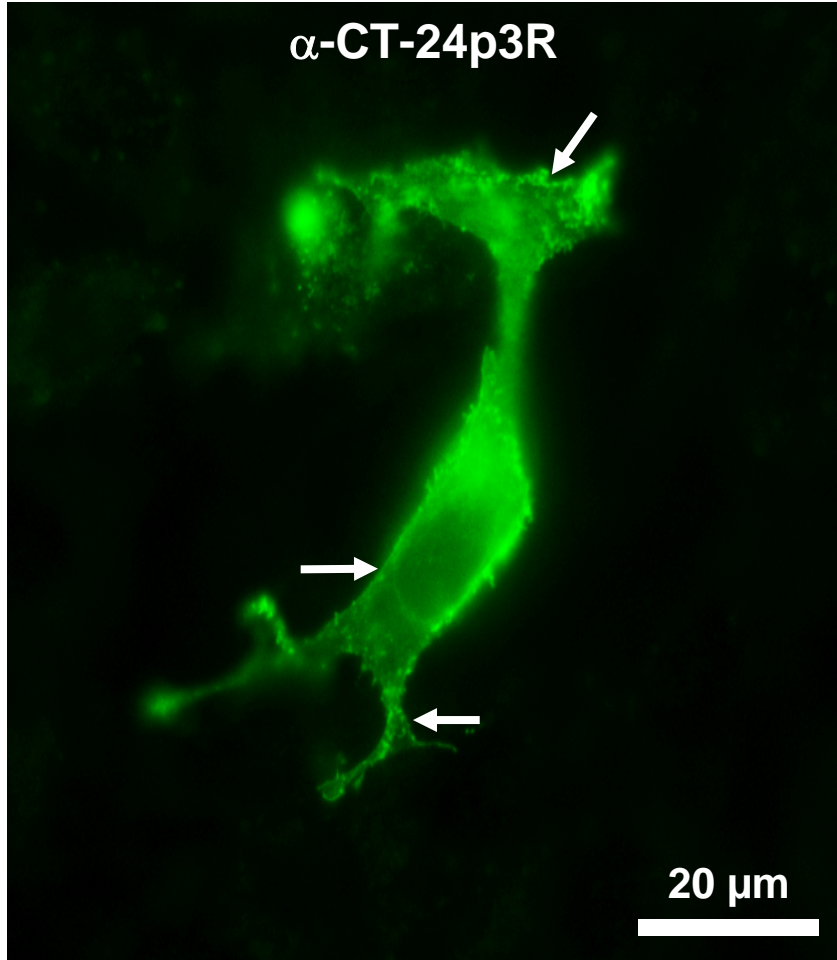

**Suppl. Figure 1**

HEK293 cells

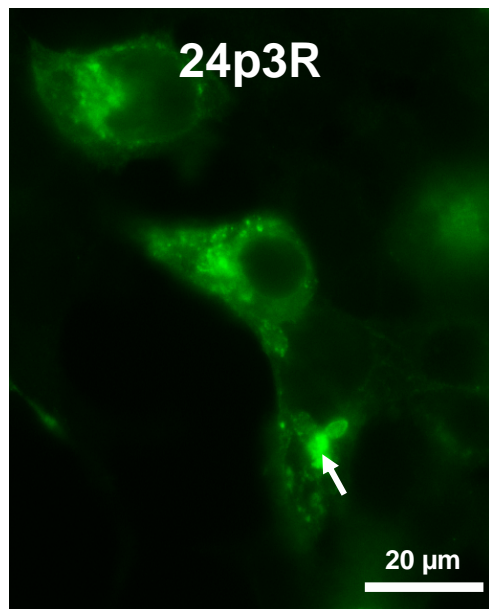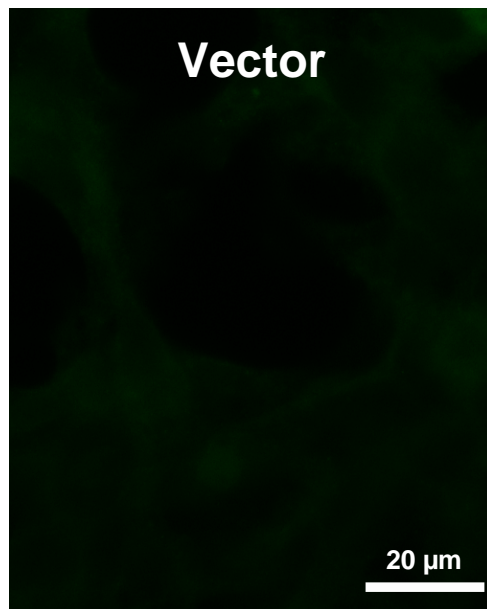

$\alpha$ CT-24p3R

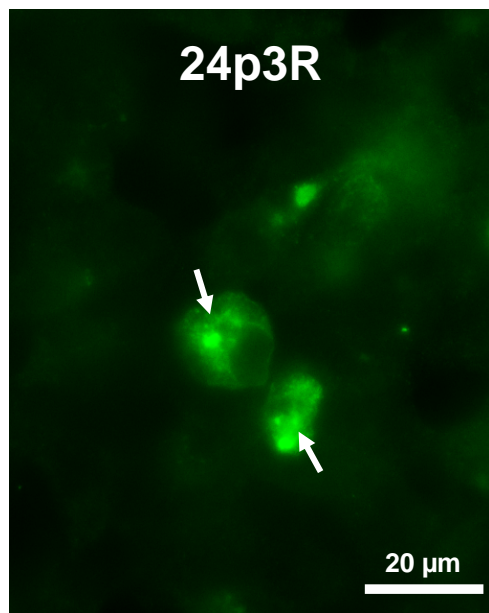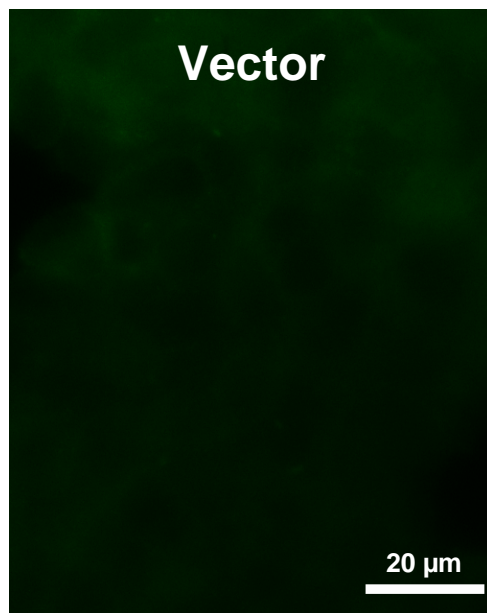

$\alpha$ NT-24p3R

| Gene                                   | GeneBank Accession Number | Primer                                                                           | Cycling Protocol                                                                |                                                                                                         | Product Size (bp) |
|----------------------------------------|---------------------------|----------------------------------------------------------------------------------|---------------------------------------------------------------------------------|---------------------------------------------------------------------------------------------------------|-------------------|
| <b>Rat 24p3R</b>                       | NM_177421.3               | <i>for</i> 5'-AGGACTGGCGGTTCTGCAG-3'<br><i>rev</i> 5'-CGTTCAGATAATCCCACAGG-3'    | Activation<br>Denaturing<br>Annealing<br>Extension<br>Final extension<br>Cycles | 95 °C for 15 min<br>94 °C for 30 sec<br>64.2 °C for 30 sec<br>72 °C for 1 min<br>72°C for 5 min<br>28   | 540               |
| <b>Murine 24p3R</b>                    | NM_021551.4               | <i>for</i> 5'-TACCTGATGCGCCTGGAGCT-3'<br><i>rev</i> 5'-TTCTCCAGTTCCTGCAAAGCTT-3' | Activation<br>Denaturing<br>Annealing<br>Extension<br>Final extension<br>Cycles | 95 °C for 10 min<br>95 °C for 30 sec<br>58.5 °C for 45 sec<br>72 °C for 10 sec<br>72°C for 10 min<br>30 | 332               |
| <b>Rat <math>\beta</math>-actin</b>    | NM_031144.2               | <i>for</i> 5'-AGATCAAGATCATTGCTCCTC-3'<br><i>rev</i> 5'-ACTCATCGTACTCCTGCTTG-3'  | Activation<br>Denaturing<br>Annealing<br>Extension<br>Final extension<br>Cycles | 95 °C for 15 min<br>94 °C for 15 sec<br>65 °C for 30 sec<br>72 °C for 30 min<br>72°C for 5 min<br>26    | 349               |
| <b>Murine <math>\beta</math>-actin</b> | NM_007393.3               | <i>for</i> 5'-GTATGGAATCCTGTGGCATC-3'<br><i>rev</i> 5'-AAGCACTTGCGGTGCACGAT-3'   | Activation<br>Denaturing<br>Annealing<br>Extension<br>Final extension<br>Cycles | 94 °C for 5 min<br>94 °C for 25 sec<br>55 °C for 25 sec<br>72 °C for 30 sec<br>72°C for 7 min<br>28     | 322               |

**Supplementary Table 1**

## **SUPPLEMENTARY FIGURE AND TABLE LEGENDS**

**SUPPLEMENTARY FIGURE 1.** Characterization of rabbit polyclonal antibodies directed against rat 24p3R  $\alpha$ -CT- and  $\alpha$ -NT-24p3R. **(A)** Immunofluorescence microscopy demonstrates that  $\alpha$ -CT-24p3R stains mouse tubules in the cortex resembling distal convoluted tubules at the apex and intracellularly (bottom panel), which is absent with pre-immune serum (top image). **(B)**  $\alpha$ -CT-24p3R detects several bands of ~50-100 kDa in HEK293 transiently overexpressing 24p3R, which are not found in vector-transfected cells. With pre-immune serum, the pattern of cross-reacting proteins does not differ between vector- and 24p3R-transfected HEK293 cells. **(C)** Immunofluorescence microscopy of 24p3R-CHO cells and the murine distal convoluted cell line mDCT209 demonstrates labeling at the plasma membranes and intracellularly with  $\alpha$ -NT-24p3R, but labeling is absent in vector-CHO cells, using pre-immune serum or after pre-absorption of the  $\alpha$ -NT-24p3R antibody with a 10-fold excess of antigenic peptide. **(D)** Immunofluorescence microscopy of 24p3R-CHO cells shows intracellular labeling with  $\alpha$ -CT-24p3R, but labeling also extends to plasma membranes (*arrows*).

**SUPPLEMENTARY FIGURE 2.** HEK293 cells overexpress 24p3R intracellularly only. Transiently 24p3R-transfected HEK293 cells, but not vector-transfected cells, express rat 24p3R intracellularly (*arrows*), as demonstrated by immunofluorescence microscopy with  $\alpha$ -CT-24p3R or  $\alpha$ -NT-24p3R.

**SUPPLEMENTARY TABLE 1.** GeneBank accession numbers, nucleotide sequences, cycling PCR protocol and product size of the primers used for RT-PCR.
